# Supplementary material
Source: publisher figshare collection journal article supplement (https://plos.figshare.com/articles/dataset/_/9200756)
Supplement: Supplementary file 1 [file 1]

Archive with 4 entries (4 files):
- pone.0219906.s001.mp4
- pone.0219906.s002.mp4
- pone.0219906.s003.pdf
- pone.0219906.s004.pdf
