# Supplementary material
Source: publisher figshare collection journal article supplement (https://plos.figshare.com/articles/dataset/_/9200756)
Supplement: Supplementary file 1 [file 1 › pone.0219906.s004.pdf]

**S2 Appendix. Extraction variation within the bed** The evaluation of extraction yield within the coffee bed requires the calculation of the local extraction yield and the variation of extraction yield across the bed. The local extraction yield (%) for one grain size can be defined by:

$$e_y(\vec{x}, t) = 100 \frac{\phi_0}{\alpha_s} \frac{c_{s0} - c_s(\vec{x}, t)}{c_{s0}}. \quad (1)$$

Similarly for two grain sizes the local yield is:

$$e_y(\vec{x}, t) = 100 \frac{\phi_0}{1 - \phi_v} \left( \frac{\alpha_{s1}}{1 - \phi_v} \frac{c_{s01} - c_{s1}(\vec{x}, t)}{c_{s01}} + \frac{\alpha_{s2}}{1 - \phi_v} \frac{c_{s02} - c_{s2}(\vec{x}, t)}{c_{s02}} \right). \quad (2)$$

The generalisation to multiple grain sizes should be clear. The average yield over the bed can be computed using:

$$\frac{1}{V_{\text{bed}}} \int_{V_{\text{bed}}} e_y(\vec{x}, t) dV, \quad (3)$$

where  $V_{\text{bed}}$  is the volume of the bed and  $dV$  is a volume element. The standard deviation can be calculated using a similar volume weighted standard deviation.
